# Supplementary material
Source: PubMed Central journal article supplement (PMC5527599)
Supplement: AAC.00313-17_zac008176440s1.pdf [file AAC.00313-17_zac008176440s1.pdf]

## <Supporting Information>

**Antibiotic resistance as a stress response: recovery of high-level oxacillin resistance in methicillin resistant *S. aureus* (MRSA) “auxiliary” mutants – by induction of the stringent stress response**

**Running title: Stringent stress and oxacillin resistance in MRSA**

Choon Keun Kim<sup>1,†</sup>, Catarina Milheiriço<sup>1,2</sup>, Hermínia de Lencastre<sup>1,2</sup>, Alexander Tomasz<sup>1</sup>

<sup>1</sup>Laboratory of Microbiology & Infectious Diseases, The Rockefeller University, New York

<sup>2</sup>Laboratory of Molecular Genetics, Instituto de Tecnologia Química e Biológica (ITQB) da Universidade Nova de Lisboa, Oeiras, Portugal

<sup>†</sup>Current address: Department of Chemistry and Biochemistry, University of Notre Dame, Notre Dame, IN 46556, USA

**Table S1. List of auxiliary mutations reducing the high-level oxacillin resistance in MRSA**

| Mutation No. | Locus in <i>S. aureus</i> COL | Functional name ( <i>gene</i> )                                                         | Name of auxiliary mutant <sup>a</sup> | Reference |
|--------------|-------------------------------|-----------------------------------------------------------------------------------------|---------------------------------------|-----------|
| 1            | SACOL0181                     | Hypothetical protein                                                                    | RUSA162/aux17                         | (1, 2)    |
| 2            | SACOL0672                     | Staphylococcal accessory regulator ( <i>sarA</i> )                                      | BB1030 <sup>b</sup>                   | (3)       |
| 3            | SACOL0810                     | Undecaprenyl-phosphate N-acetylglucosaminyl 1-phosphate transferase ( <i>Ilm/tarO</i> ) | SRM563 <sup>c</sup>                   | (4)       |
| 4            | SACOL0828                     | TPR domain protein                                                                      | RUSA277/aux18                         | (1, 2)    |
| 5            | SACOL0830                     | Hypothetical protein                                                                    | RUSA262/aux14                         | (1, 2)    |
| 6            | SACOL1023                     | UDP-N-acetylmuramoylalanyl-D-glutamate-2,6-diaminopimelate ligase ( <i>murE/femF</i> )  | RUSA235                               | (1, 2)    |
| 7            | SACOL1066                     | Protein FmtA ( <i>fmtA</i> )                                                            | COL-TS339                             | (5)       |
| 8            | SACOL1231                     | Protein phosphatase 2C domain protein ( <i>ptc1</i> )                                   | SABS1/aux1                            | (2)       |
| 9            | SACOL1315                     | DNA mismatch repair protein MutS ( <i>mutS/hexA</i> )                                   | RUSA254/aux9                          | (1, 2)    |
| 10           | SACOL1316                     | DNA mismatch repair protein MutL ( <i>mutL/hexB</i> )                                   | RUSA219/aux8                          | (2)       |
| 11           | SACOL1329                     | Glutamine synthetase repressor ( <i>glnR/femC</i> )                                     | RUSA208/209                           | (1, 2)    |
| 12           | SACOL1377                     | Transketolase ( <i>tkt</i> )                                                            | RUSA164/aux6                          | (1, 2)    |
| 13           | SACOL1396                     | Oxacillin resistance-related protein FmtC ( <i>fmtC</i> )                               | COL-TS1                               | (6)       |
| 14           | SACOL1398                     | Transcriptional regulator ( <i>msrR</i> )                                               | BB1259 <sup>b</sup>                   | (7)       |
| 15           | SACOL1404                     | Anthranilate synthase component II, glutamine amidotransferase ( <i>trpG</i> )          | RUSA279/aux5                          | (1, 2)    |
| 16           | SACOL1410                     | Aminoacyltransferase FemA ( <i>femA</i> )                                               | BB308/BB403 <sup>b</sup>              | (8)       |
| 17           | SACOL1411                     | Aminoacyltransferase FemB ( <i>femB</i> )                                               | RUSA10                                | (1)       |
| 18           | SACOL1424                     | Phosphate ABC transporter, phosphate-binding protein ( <i>pstS</i> )                    | RUSA305/aux12                         | (1, 2)    |
| 19           | SACOL1435                     | Diaminopimelate decarboxylase ( <i>lysA</i> )                                           | RUSA239/aux11                         | (1, 2)    |
| 20           | SACOL1444                     | Hypothetical protein                                                                    | SABS15/aux3                           | (2)       |
| 21           | SACOL1490                     | Penicillin-binding protein 2 ( <i>pbp2</i> )                                            | RUSA130                               | (1)       |
| 22           | SACOL1712                     | Putative ammonia monooxygenase ( <i>abrB</i> )                                          | RUSA233/aux10                         | (1, 2)    |
| 23           | SACOL1786                     | Catabolite control protein A ( <i>ccpA</i> )                                            | SABS38/aux4                           | (2)       |
| 24           | SACOL1801                     | Putative dipeptidase ( <i>pepV</i> )                                                    | RUSA188/aux7                          | (1, 2)    |
| 25           | SACOL1984                     | Aldehyde dehydrogenase ( <i>aldA2</i> )                                                 | RUSA192/aux21                         | (1, 2)    |
| 26           | SACOL2026                     | Accessory gene regulator A ( <i>agrA</i> )                                              | BB1165 <sup>b</sup>                   | (9)       |
| 27           | SACOL2045                     | Ketol-acid reductoisomerase ( <i>ilvC</i> )                                             | SABS24/aux20                          | (2)       |
| 28           | SACOL2054                     | RNA polymerase sigma-37 factor ( <i>rpoF</i> )                                          | RUSA168                               | (1)       |
| 29           | SACOL2073                     | UDP-N-acetylmuramoyl-tripeptide-D-alanyl-D-alanine ligase ( <i>murF</i> )               | Mutant F                              | (10)      |
| 30           | SACOL2150                     | Phosphoglucomutase FmtB/Mrp ( <i>sasB</i> )                                             | RUSA266                               | (1)       |
| 31           | SACOL2151                     | Phosphoglucosamine mutase ( <i>glmM/femD</i> )                                          | RUSA315                               | (1)       |
| 32           | SACOL2253                     | Lipid II:glycine glycytransferase ( <i>fmhB/femX</i> )                                  | SR18 <sup>b</sup>                     | (11)      |
| 33           | SACOL2630                     | Putative winged-helix DNA-binding protein                                               | RUSA233/aux16                         | (1, 2)    |
| 34           | SACOL2725                     | ABC transporter, permease protein                                                       | RUSA221/aux19                         | (1, 2)    |

<sup>a</sup> The parental strain of auxiliary mutants is *S. aureus* COL unless indicated.

<sup>b</sup> The parental strain is a laboratory strain BB270 (12), a methicillin-resistant derivative of *S. aureus* 8325.

<sup>c</sup> Tn918 laboratory mutant of MRSA clinical isolate SRM551 (4).

**Table S2. The mupirocin effect is restricted to antibiotic resistance based on the *mecA* determinant**

|                            |           | MIC of oxacillin ( $\mu\text{g/ml}$ ) |           |                     |           |
|----------------------------|-----------|---------------------------------------|-----------|---------------------|-----------|
|                            |           | M100 (no <i>mecA</i> )                |           | COL ( <i>mecA</i> ) |           |
| Mutated gene               | Recipient | none                                  | mupirocin | none                | mupirocin |
|                            | None      |                                       | 2         | 2                   | >256      |
| <i>SACOL0830</i> (RUSA262) |           | 0.25                                  | 0.75      | 1.5                 | 128       |
| <i>murE</i> (RUSA235)      |           | 0.75                                  | 1.5       | 1                   | >256      |
| <i>pbp2</i> (RUSA130)      |           | 0.5                                   | 0.75      | 48                  | >256      |

MIC was obtained from three experiments independently performed.

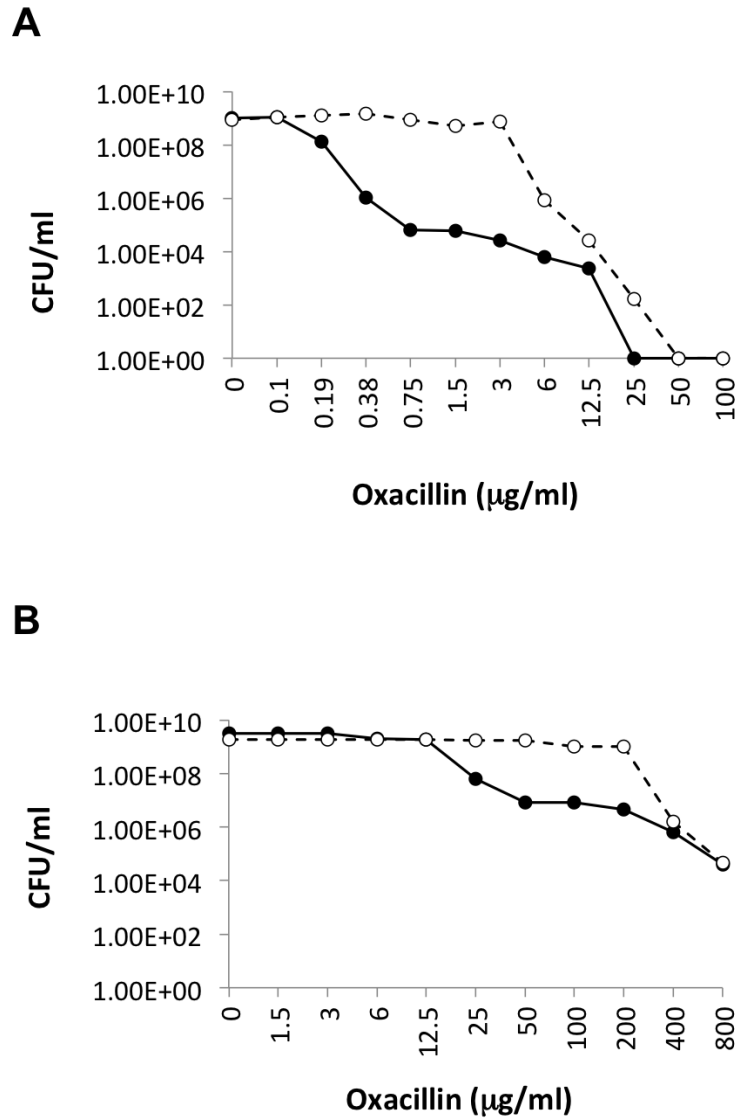

**Figure S1.** Effect of the stringent stress on MRSA strain LGA251 (**A**) and on *S. sciuri* strain SS37 (**B**), carrying, respectively, *mecC* – in LGA251 (13) – and *mecA1* a putative evolutionary precursor of the *mecA* determinant – in *S. sciuri* SS37 (14, 15). Antibiotic resistance levels were determined by population analysis. Colony-forming units (CFU) were calculated by counting colonies after 48 h of incubation on tryptic soy agar plates with or without 0.03 µg/ml of mupirocin at 37 °C. Closed circles indicate the resistance of strains without induction (●); open circles indicate the resistance of strains induced with mupirocin (○).

## References

1. **de Lencastre H, Tomasz A.** 1994. Reassessment of the number of auxiliary genes essential for expression of high-level methicillin resistance in *Staphylococcus aureus*. *Antimicrob Agents Chemother* **38**:2590-2598.
2. **De Lencastre H, Wu SW, Pinho MG, Ludovice AM, Filipe S, Gardete S, Sobral R, Gill S, Chung M, Tomasz A.** 1999. Antibiotic resistance as a stress response: complete sequencing of a large number of chromosomal loci in *Staphylococcus aureus* strain COL that impact on the expression of resistance to methicillin. *Microb Drug Resist* **5**:163-175.
3. **Piriz Duran S, Kayser FH, Berger-Bachi B.** 1996. Impact of *sar* and *agr* on methicillin resistance in *Staphylococcus aureus*. *FEMS Microbiol Lett* **141**:255-260.
4. **Maki H, Yamaguchi T, Murakami K.** 1994. Cloning and characterization of a gene affecting the methicillin resistance level and the autolysis rate in *Staphylococcus aureus*. *J Bacteriol* **176**:4993-5000.
5. **Komatsuzawa H, Sugai M, Ohta K, Fujiwara T, Nakashima S, Suzuki J, Lee CY, Suginaka H.** 1997. Cloning and characterization of the *fmt* gene which affects the methicillin resistance level and autolysis in the presence of triton X-100 in methicillin-resistant *Staphylococcus aureus*. *Antimicrob Agents Chemother* **41**:2355-2361.
6. **Komatsuzawa H, Ohta K, Fujiwara T, Choi GH, Labischinski H, Sugai M.** 2001. Cloning and sequencing of the gene, *fmtC*, which affects oxacillin resistance in methicillin-resistant *Staphylococcus aureus*. *FEMS Microbiol Lett* **203**:49-54.
7. **Vasilieva E, Labischinski H, Berger-Bachi B.** 1997. Identification and mapping of new chromosomal sites affecting response to beta-lactams in *Staphylococcus aureus*. *Int J Antimicrob Agents* **8**:13-21.
8. **Berger-Bachi B, Barberis-Maino L, Strassle A, Kayser FH.** 1989. *FemA*, a host-mediated factor essential for methicillin resistance in *Staphylococcus aureus*: molecular cloning and characterization. *Mol Gen Genet* **219**:263-269.
9. **Roemer T, Schneider T, Pinho MG.** 2013. Auxiliary factors: a chink in the armor of MRSA resistance to beta-lactam antibiotics. *Curr Opin Microbiol* **16**:538-548.
10. **Sobral RG, Ludovice AM, Gardete S, Tabei K, De Lencastre H, Tomasz A.** 2003. Normally functioning *murF* is essential for the optimal expression of methicillin resistance in *Staphylococcus aureus*. *Microb Drug Resist* **9**:231-241.
11. **Rohrer S, Ehlert K, Tschierske M, Labischinski H, Berger-Bachi B.** 1999. The essential *Staphylococcus aureus* gene *fmbB* is involved in the first step of peptidoglycan pentaglycine interpeptide formation. *Proc Natl Acad Sci U S A* **96**:9351-9356.
12. **Berger-Bachi B.** 1983. Insertional inactivation of staphylococcal methicillin resistance by Tn551. *J Bacteriol* **154**:479-487.
13. **Garcia-Alvarez L, Holden MT, Lindsay H, Webb CR, Brown DF, Curran MD, Walpole E, Brooks K, Pickard DJ, Teale C, Parkhill J, Bentley SD, Edwards GF, Girvan EK, Kearns AM, Pichon B, Hill RL, Larsen AR, Skov RL, Peacock SJ, Maskell DJ, Holmes MA.** 2011. Methicillin-resistant *Staphylococcus aureus* with a novel *mecA* homologue in human and bovine populations in the UK and Denmark: a descriptive study. *Lancet Infect Dis* **11**:595-603.
14. **Couto I, Wu SW, Tomasz A, de Lencastre H.** 2003. Development of methicillin resistance in clinical isolates of *Staphylococcus sciuri* by transcriptional activation of the *mecA* homologue native to *S. sciuri*. *J Bacteriol* **185**:645-653.
15. **Zhou Y, Antignac A, Wu SW, Tomasz A.** 2008. Penicillin-binding proteins and cell wall composition in beta-lactam-sensitive and -resistant strains of *Staphylococcus sciuri*. *J Bacteriol* **190**:508-514.
